# Supplementary material
Source: PubMed Central journal article supplement (PMC6176602)
Supplement: pnas.1803716115.sapp.pdf [file pnas.1803716115.sapp.pdf]

**Supporting Table 1.** Raw values of median (inter-quartile range) response characteristics to sensory and LC activation, and sensory stimulus intensity. All values rounded to the nearest whole number. n/a = not assessed, - = no significant response.

|                                 | <b>Low Intensity Sensory Stimulus Alone</b> | <b>Phasic LC Stimulation after Low Level Sensory</b> | <b>Tonic LC Stimulation during Low Level Sensory</b> | <b>High Intensity Sensory Stimulation Alone</b> | <b>Phasic LC Stimulation Preceding Low Level Sensory Stimulation</b> |                  |
|---------------------------------|---------------------------------------------|------------------------------------------------------|------------------------------------------------------|-------------------------------------------------|----------------------------------------------------------------------|------------------|
| <b>Short latency onset (ms)</b> | 13(11-17)                                   | 12 (7-16)                                            | 14 (11-17)                                           | 13 (11-17)                                      | n/a                                                                  | <i>Modulated</i> |
|                                 | -                                           | 16 (13-19)                                           | 11 (2-17)                                            | 17 (13-19)                                      | n/a                                                                  | <i>Gated</i>     |
| <b>Short latency magnitude</b>  | 40 (12-97)                                  | 61 (22-114)                                          | 39 (21-99)                                           | 63 (27-224)                                     | n/a                                                                  | <i>Modulated</i> |
|                                 | -                                           | 23 (4-64)                                            | 33 (10-34)                                           | 22 (7-72)                                       | n/a                                                                  | <i>Gated</i>     |
| <b>Long latency magnitude</b>   | 102(47-163)                                 | 218(20-617)                                          | 147(19-524)                                          | 166(74-631)                                     | 106(0-167)                                                           | <i>Modulated</i> |
|                                 | n/a                                         | 680(40-774)                                          | 185(55-412)                                          | 1707(93-1806)                                   | 319(200-320)                                                         | <i>Gated</i>     |
